# Supplementary material for: Integrin α7 is a functional cancer stem cell surface marker in oesophageal squamous cell carcinoma
Source: PubMed Central journal article supplement (PMC5150658; doi:10.1038/ncomms13568), 2016-12-07
Supplement: ncomms13568-s1.pdf [file ncomms13568-s1.pdf]

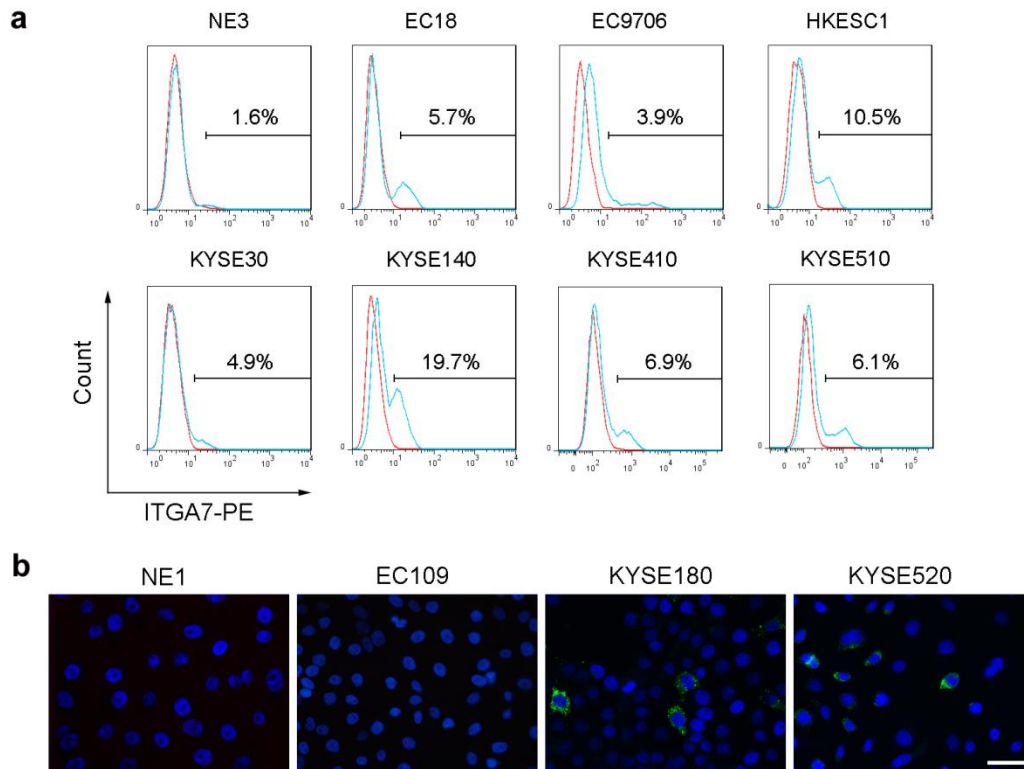

**Supplementary Figure 1. ITGA7 is sporadically expressed in ESCC.** (a) Percentage of ITGA7<sup>+</sup> cells was detected by FACS in immortalized esophageal epithelial cell line NE3 and ESCC cell lines (Red: isotype control; blue: ITGA7-PE). (b) Representative immunofluorescence images of ITGA7<sup>+</sup> cells in esophageal cell lines (green: ITGA7; blue: nuclear DAPI staining; scale bar = 50  $\mu$ m).

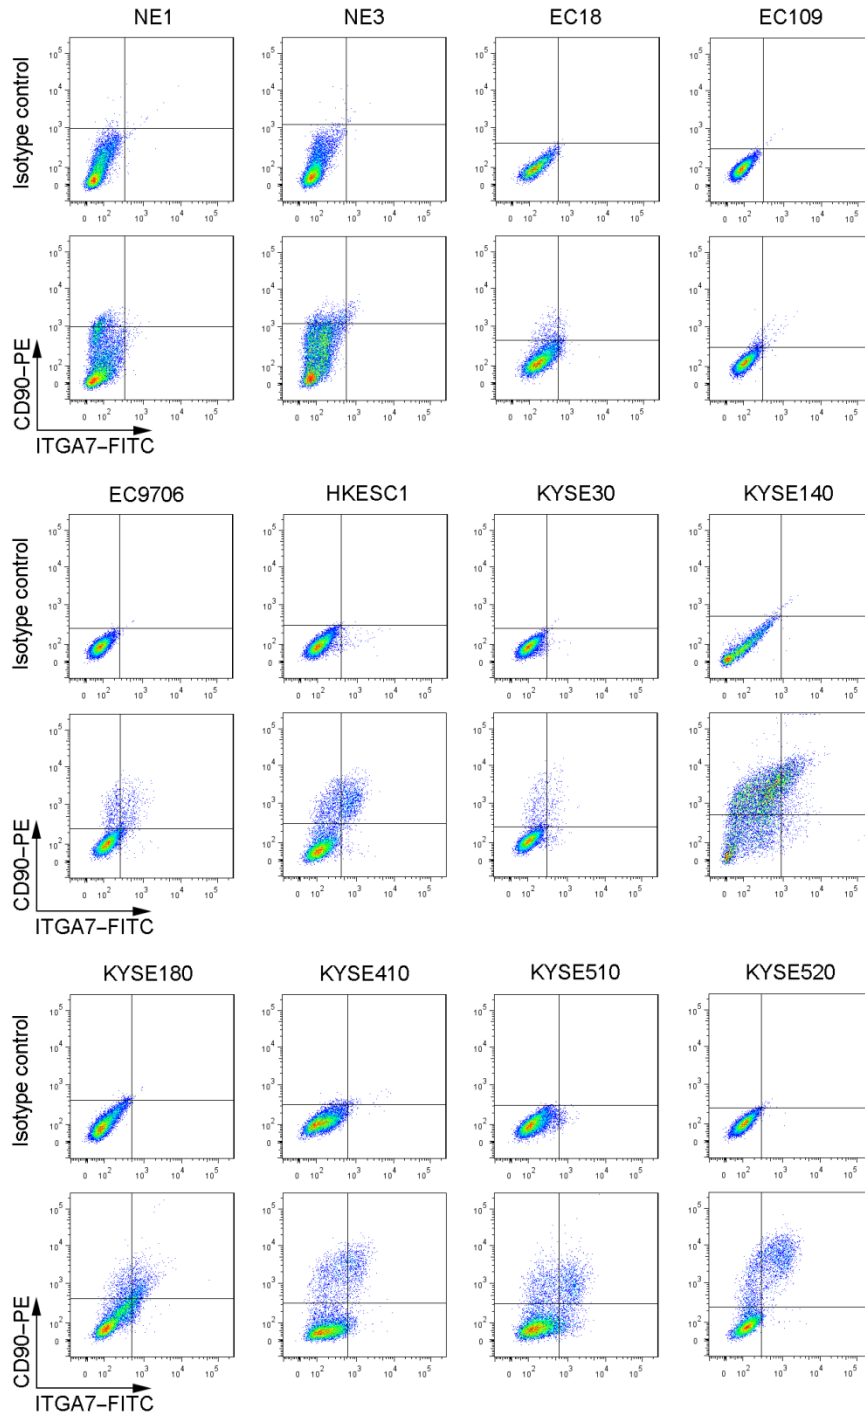

**Supplementary Figure 2.** The overlap expression of ITGA7 and CD90 in immortalized esophageal epithelial cell lines (NE1 and NE3) and ESCC cell lines.

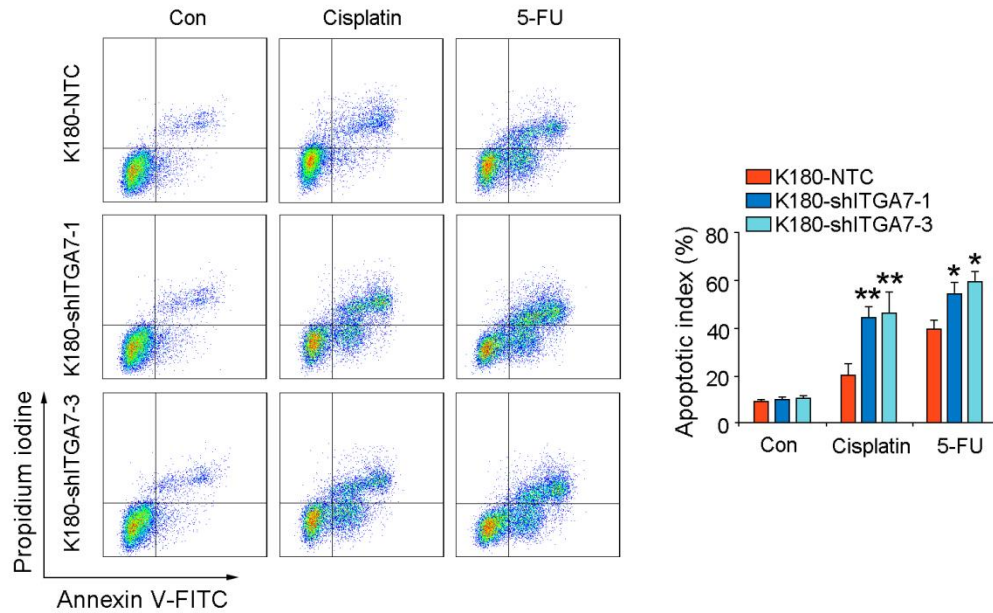

**Supplementary Figure 3. Knockdown of *ITGA7* promotes apoptosis in ESCC cells.**

Representative of apoptosis analysis showing that sh*ITGA7*-transfected KYSE180 cells were less resistant to cisplatin and 5-FU. The apoptotic index was summarized in the bar chart and the value indicated the mean  $\pm$  s.d. of three independent experiments. Statistics: ANOVA with post hoc test. \*,  $P < 0.05$ ; \*\*,  $P < 0.001$ .

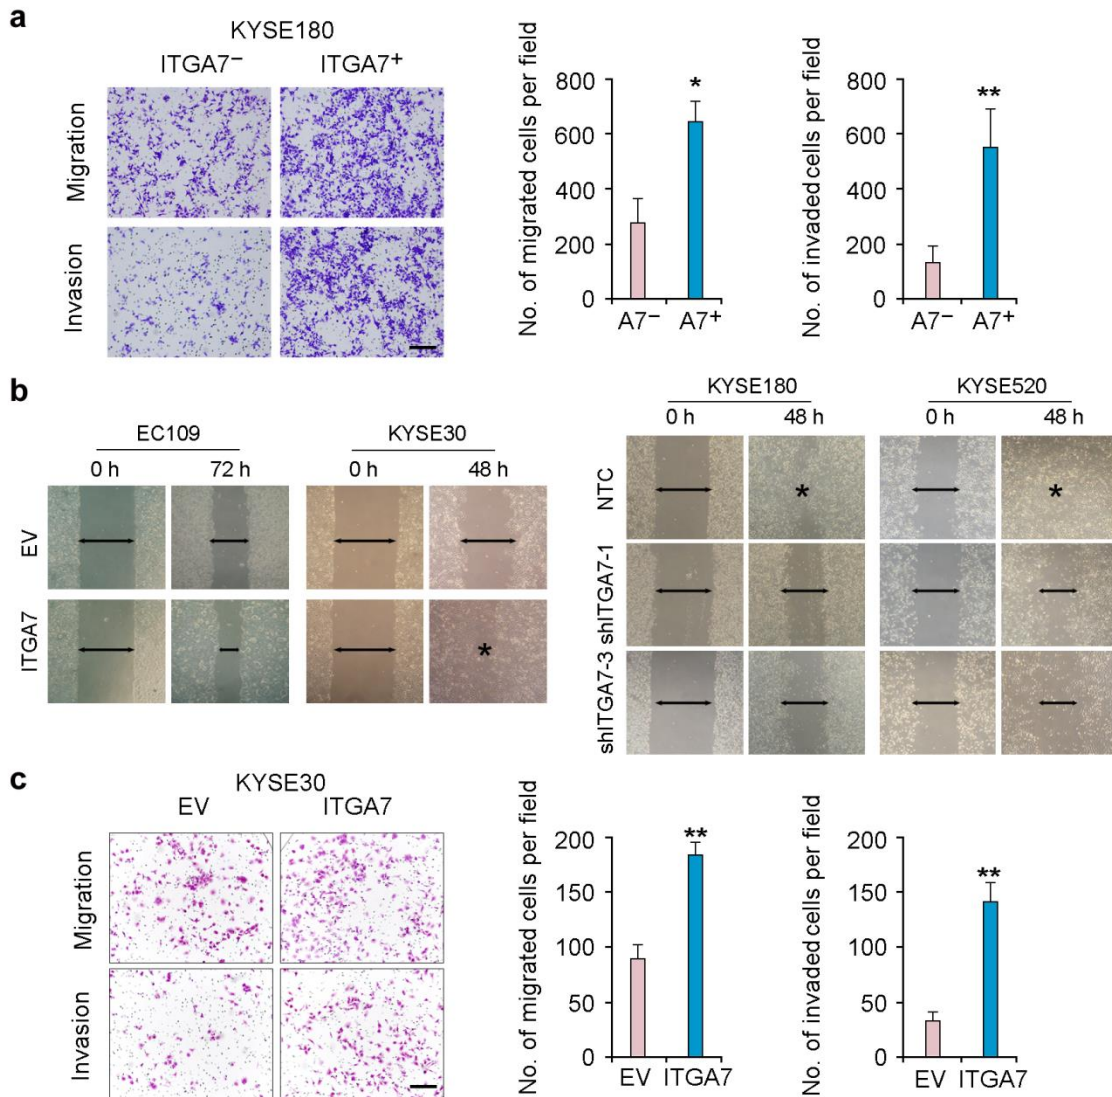

**Supplementary Figure 4. ITGA7 promotes ESCC cell migration and invasion. (a & c)** Representatives and summary of migration and invasion assays showing that ITGA7<sup>+</sup> KYSE180 cells and ITGA7-KYSE30 cells exhibited enhanced migration and invasion abilities, compare to their negative counterparts. The value expressed as the mean  $\pm$  s.d. of three independent experiments. Scale bar = 200  $\mu$ m. **(b)** ITGA7-transfected cells showed higher motility in wound-healing assay, while knockdown of ITGA7 suppressed cell motility. Statistics: (a and c) Student *t* test. \*,  $P < 0.05$ ; \*\*,  $P < 0.001$ .

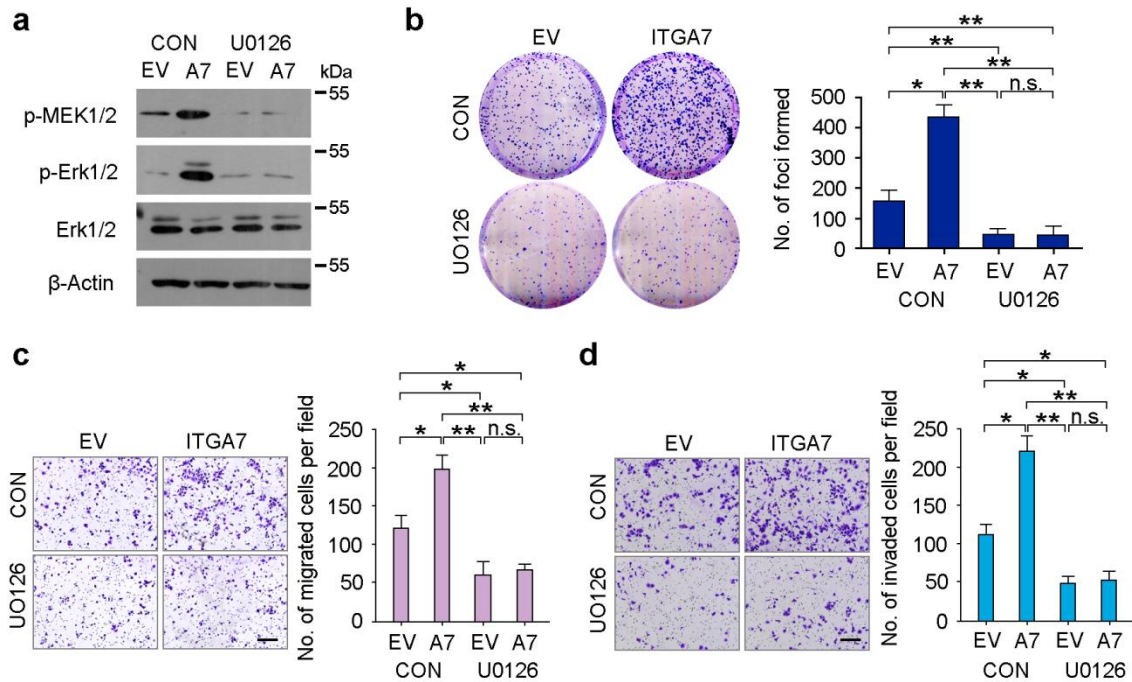

**Supplementary Figure 5. MEK1/2 inhibitor suppresses ITGA7 mediated tumorigenicity and metastasis.** (a) Western blot analyses showed that the phosphorylation of MEK1/2 and downstream player Erk1/2 was significantly blocked in *ITGA7*-transfected KYSE30 cells after treatment with 20  $\mu$ M MEK1/2 inhibitor U0126 for 24 hours. Functional assays demonstrated that U0126 treatment could effectively inhibit the abilities of foci formation (b), cell migration (c; 200  $\mu$ m scale bar), and invasion (d; 200  $\mu$ m scale bar). The number of foci, migrated and invaded cells was calculated from three independent experiments and depicted as the mean  $\pm$  s.d. in the bar chart. Statistics: (b, c and d) ANOVA with post hoc test. \*,  $P < 0.05$ ; \*\*,  $P < 0.001$ ; n.s.,  $P \geq 0.05$ .

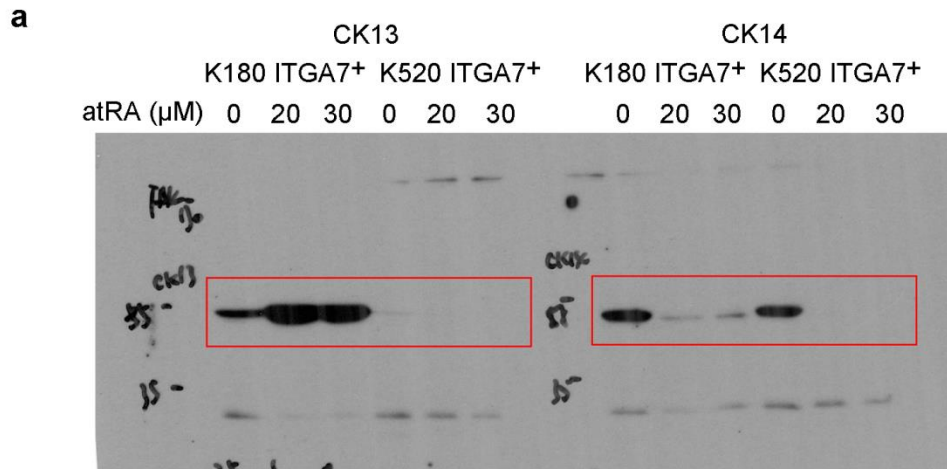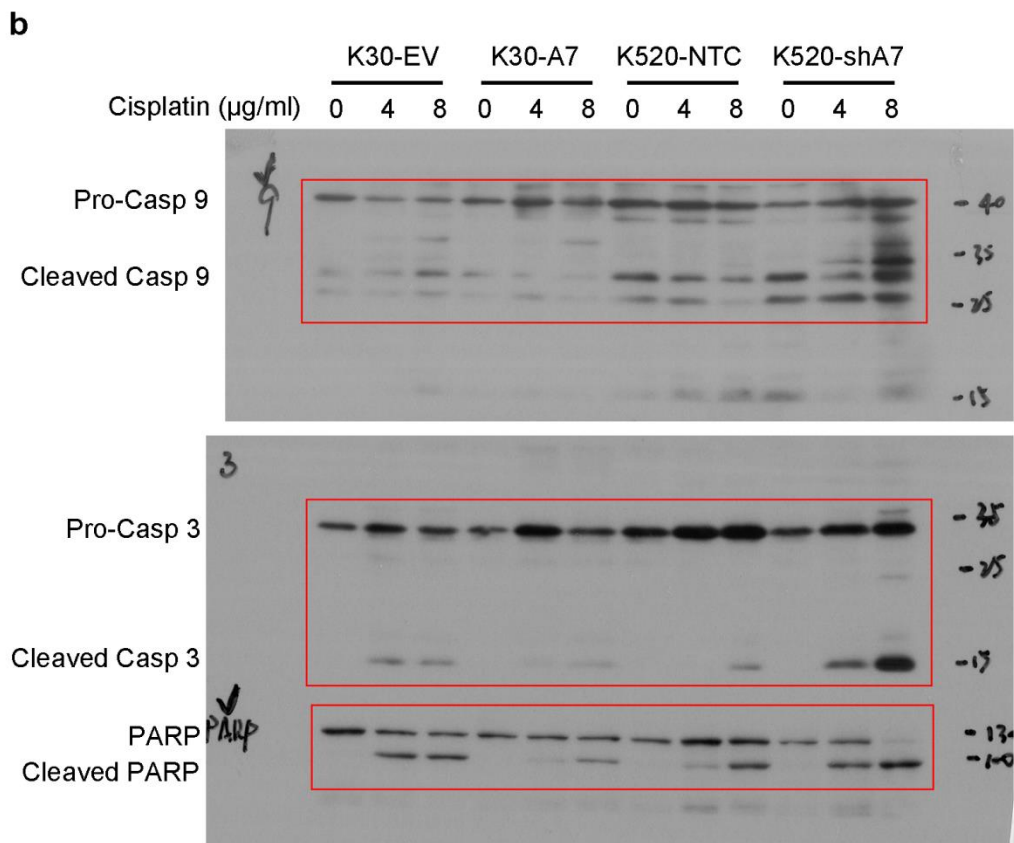

**Supplementary Figure 6. (a-b)** Full blots of Fig. 3c and Fig. 7f respectively.

**Supplementary Table 1.** Frequencies of ITGA7<sup>+</sup> cells in ESCC tumor tissues

| <b>ITGA7(%)</b> | <b>No. of ESCC cases</b> |
|-----------------|--------------------------|
| 0-0.3           | 41                       |
| 0.3-0.6         | 84                       |
| 0.6-1           | 78                       |
| 1-2             | 32                       |
| 2-3             | 14                       |
| 3-4             | 10                       |
| 4-5             | 3                        |
| <b>Total</b>    | <b>262</b>               |

**Supplementary Table 2.** Frequencies of ITGA7<sup>+</sup> and CD90<sup>+</sup> cells in esophageal cell lines

| <b>Cell line</b> | <b>ITGA7<sup>+</sup>/CD90<sup>+</sup></b> | <b>ITGA7<sup>+</sup>/CD90<sup>-</sup></b> | <b>ITGA7<sup>-</sup>/CD90<sup>+</sup></b> | <b>ITGA7<sup>-</sup>/CD90<sup>-</sup></b> |
|------------------|-------------------------------------------|-------------------------------------------|-------------------------------------------|-------------------------------------------|
| NE1              | 0.29%                                     | 1.33%                                     | 7.04%                                     | 91.34%                                    |
| NE3              | 1.20%                                     | 0.21%                                     | 7.30%                                     | 91.29%                                    |
| EC18             | 2.95%                                     | 1.98%                                     | 6.47%                                     | 88.60%                                    |
| EC109            | 0.52%                                     | 0.81%                                     | 0.97%                                     | 97.70%                                    |
| EC9706           | 2.20%                                     | 1.53%                                     | 3.08%                                     | 93.19%                                    |
| HKESC1           | 11.10%                                    | 1.03%                                     | 7.74%                                     | 80.13%                                    |
| KYSE30           | 3.80%                                     | 1.02%                                     | 4.88%                                     | 90.30%                                    |
| KYSE140          | 16.80%                                    | 1.30%                                     | 50.80%                                    | 31.10%                                    |
| KYSE180          | 13.50%                                    | 4.26%                                     | 7.40%                                     | 74.84%                                    |
| KYSE410          | 6.22%                                     | 2.32%                                     | 8.21%                                     | 83.25%                                    |
| KYSE510          | 5.50%                                     | 1.40%                                     | 11.50%                                    | 81.60%                                    |
| KYSE520          | 17.10%                                    | 1.48%                                     | 7.52%                                     | 73.90%                                    |

**Supplementary Table 3.** Overlap expression of ITGA7 and CD90

| <b>Cell line</b> | <b>ITGA7<sup>+</sup><sup>a</sup></b> | <b>CD90<sup>+</sup><sup>b</sup></b> | <b>ITGA7<sup>+</sup>/CD90<sup>+</sup> in total ITGA7<sup>+</sup><sup>c</sup></b> |
|------------------|--------------------------------------|-------------------------------------|----------------------------------------------------------------------------------|
| NE1              | 1.62%                                | 7.33%                               | 17.90%                                                                           |
| NE3              | 1.41%                                | 8.50%                               | 85.11%                                                                           |
| EC18             | 4.93%                                | 9.42%                               | 59.84%                                                                           |
| EC109            | 1.33%                                | 1.49%                               | 39.10%                                                                           |
| EC9706           | 3.73%                                | 5.28%                               | 58.98%                                                                           |
| HKESC1           | 12.13%                               | 18.84%                              | 91.51%                                                                           |
| KYSE30           | 4.82%                                | 8.68%                               | 78.84%                                                                           |
| KYSE140          | 18.10%                               | 67.60%                              | 92.82%                                                                           |
| KYSE180          | 17.76%                               | 20.90%                              | 76.01%                                                                           |
| KYSE410          | 8.54%                                | 14.43%                              | 72.83%                                                                           |
| KYSE510          | 6.90%                                | 17.00%                              | 79.71%                                                                           |
| KYSE520          | 18.58%                               | 24.62%                              | 92.03%                                                                           |

<sup>a</sup>Calculation formula: CD90<sup>+</sup>/ITGA7<sup>+</sup>% + CD90<sup>-</sup>/ITGA7<sup>+</sup>%;

<sup>b</sup>Calculation formula: CD90<sup>+</sup>/ITGA7<sup>+</sup>% + CD90<sup>+</sup>/ITGA7<sup>-</sup>%;

<sup>c</sup>Calculation formula: CD90<sup>+</sup>/ITGA7<sup>+</sup>% / (CD90<sup>+</sup>/ITGA7<sup>+</sup>% + CD90<sup>-</sup>/ITGA7<sup>+</sup>%).



**Supplementary Table 4.** List of antibodies used in this project

| <b>Antibody</b>                           | <b>Cat No.</b> | <b>Vendor</b>    | <b>Application</b>                |
|-------------------------------------------|----------------|------------------|-----------------------------------|
| Mouse anti-human ITGA7                    | AT2566a        | Abgent           | WB, 1:1000; IHC<br>FACS IF, 1:100 |
| Rabbit anti-human ITGA7                   | AP18839a       | Abgent           | FACS IF, 1:100                    |
| PE mouse anti-human CD90                  | 555596         | BD Pharmingen    | FACS, 1:20                        |
| Purified mouse anti-human CD90            | 555593         | BD Pharmingen    | IF, 1:50                          |
| Mouse anti-human CD90                     | ab225          | Abcam            | WB, 1:500                         |
| Rabbit anti-human FAK                     | #13009         | Cell Signaling   | WB, 1:1000                        |
| Rabbit anti-human FAK (Tyr397)            | #8556          | Cell Signaling   | WB, 1:1000                        |
| Rabbit anti-human Src                     | #2109          | Cell Signaling   | WB, 1:1000                        |
| Rabbit anti-human Src (Tyr416)            | #6943          | Cell Signaling   | WB, 1:1000                        |
| Rabbit anti-human c-Raf                   | #9422          | Cell Signaling   | WB, 1:1000                        |
| Rabbit anti-human c-Raf (Ser259)          | #9421          | Cell Signaling   | WB, 1:1000                        |
| Rabbit anti-human MEK1/2 (Ser217/221)     | #9154          | Cell Signaling   | WB, 1:1000                        |
| Rabbit anti-human Erk1/2                  | #9102          | Cell Signaling   | WB, 1:1000                        |
| Rabbit anti-human Erk1/2 (Thr202/204)     | #9101          | Cell Signaling   | WB, 1:1000                        |
| Mouse anti-human $\beta$ -actin           | ab6276         | Abcam            | WB, 1:5000                        |
| Rabbit anti-human E-Cadherin              | #3195P         | Cell Signaling   | WB, 1:1000                        |
| Mouse anti-human $\beta$ -Catenin         | #9562          | Cell Signaling   | WB, 1:1000                        |
| Mouse anti-human Fibronectin              | ab6328         | Abcam            | WB, 1:500                         |
| Mouse anti-human Vimentin                 | #3390S         | Cell Signaling   | WB, 1:1000                        |
| Mouse anti-human $\alpha$ -SMA            | A2547          | Sigma-Aldrich    | WB, 1:2000                        |
| Rabbit anti-human Akt                     | #9272          | Cell Signaling   | WB, 1:1000                        |
| Rabbit anti-human Akt (Ser473)            | #9271          | Cell Signaling   | WB, 1:1000                        |
| Rabbit anti-human Caspase-9               | #9502          | Cell Signaling   | WB, 1:1000                        |
| Rabbit anti-human Caspase-3               | #9662          | Cell Signaling   | WB, 1:1000                        |
| Rabbit anti-human PARP                    | #9542          | Cell Signaling   | WB, 1:1000                        |
| Rabbit anti-human CK13                    | NBP2-16086     | Novus biological | WB, 1:2000                        |
| Rabbit anti-human CK14                    | NBP1-84917     | Novus biological | WB, 1:2000                        |
| Rabbit anti-human OCT3/4                  | #2750          | Cell Signaling   | WB, 1:4000                        |
| Rabbit anti-human SOX2                    | #3579          | Cell Signaling   | WB, 1:4000                        |
| Rabbit anti-human NANOG                   | #4903          | Cell Signaling   | WB, 1:4000                        |
| Goat anti-mouse IgG HRP                   | A4416          | Sigma-Aldrich    | WB, 1:10000                       |
| Goat anti-rabbit IgG HRP                  | A9169          | Sigma-Aldrich    | WB, 1:10000                       |
| Mouse IgG2a Isotype Control               | M076-3         | MBL              | FACS, 1:200                       |
| Rabbit IgG Isotype Control                | SC-3888        | Santa Cruz       | FACS IF, 1:100                    |
| PE mouse IgG1 Control                     | 12-4714-82     | eBioscience      | FACS, 1:20                        |
| PE anti-mouse IgG2a                       | SC-3765        | Santa Cruz       | FACS, 1:100                       |
| CF <sup>TM</sup> 488 goat anti-mouse IgG  | 20014-1        | Biotium          | FACS IF, 1:5000                   |
| CF <sup>TM</sup> 488 goat anti-rabbit IgG | 20012-1        | Biotium          | FACS IF, 1:5000                   |

**Supplementary Table 5.** List of PCR primers for expression, cloning and BGS

| <b>Gene Name</b>                        | <b>Primer Sequence (5'-3')</b>                                                                           |
|-----------------------------------------|----------------------------------------------------------------------------------------------------------|
| <b>For Real-time PCR</b>                |                                                                                                          |
| <i>ITGA7</i><br>NM_002206.2             | Forward: CTGACTCCATGTTTCGGGATCA<br>Reverse: CACCTGTGAAGGTTTGGCG                                          |
| <i>OCT3/4</i><br>NM_002701              | Forward: CTTGCTGCAGAAGTGGGTGGAGGAA<br>Reverse: CTGCAGTGTGGGTTTCGGGCA                                     |
| <i>SOX2</i><br>NM_003106                | Forward: AAATGGGAGGGGTGCAAAGAGGAG<br>Reverse: CAGCTGTCATTTGCTGTGGGTGATG                                  |
| <i>NANOG</i><br>NM_024865               | Forward: AATACCTCAGCCTCCAGCAGATG<br>Reverse: TGCGTACACCATTGCTATTCTTC                                     |
| <i>NOTCH1</i><br>NM_017617              | Forward: CCTGAGGGCTTCAAAGTGTC<br>Reverse: CGGAACTTCTTGGTCTCCAG                                           |
| <i>GAPDH</i><br>NM_001256799            | Forward: GGAGCGAGATCCCTCCAAAAT<br>Reverse: GGCTGTTGTCATACTTCTCATGG                                       |
| <b>For full length cDNA</b>             |                                                                                                          |
| <i>ITGA7</i><br>NM_002206.2             | Forward: <i>gctctaga</i> GATTTCCCTTGCATTCGCTGGGAGCTC<br>Reverse: <i>cgggatcc</i> CTAGGCGGTGCCTGGCCCTGGAT |
| <b>For BGS</b>                          |                                                                                                          |
| <i>ITGA7</i> -NCG1<br>+19,539 - +19,955 | Forward: AGGAGGTAAGGGGAAGGGAGGG<br>Reverse: CCCACCTCCAAACCTCACCTTC                                       |
| <i>ITGA7</i> -NCG2<br>+13,679 - +14,162 | Forward: ATTGGAGGGAGGGGGTATTGAT<br>Reverse: TCCCCCAACTAAAACCCACAAC                                       |
| <i>ITGA7</i> -NCG3<br>+4,167 - +4,600   | Forward: GTTTTTGTTGGGTTTTTGATGA<br>Reverse: AATATCAATTTTCTCAAACCCT                                       |

**Supplementary Table 6.** List of reagents used in this project

| reagents                                           | Cat No. | Vendor         |
|----------------------------------------------------|---------|----------------|
| 5-aza-2'-deoxycytidine (5-aza-dC )                 | A3656   | Sigma-Aldrich  |
| All-trans retinoic acid (atRA)                     | R2625   | Sigma-Aldrich  |
| 1,2,4,5-Benzenetetraamine tetrahydrochloride (Y15) | 305065  | Sigma-Aldrich  |
| U0126                                              | #9903   | Cell Signaling |

**Supplementary Table 7.** The shRNA sequences for lentiviral transduction

| Gene                          | shRNA Sequence                                                                                                                                                 |
|-------------------------------|----------------------------------------------------------------------------------------------------------------------------------------------------------------|
| <i>ITGA7</i><br>(NM_002206.2) | TRCN0000057708:CCGGCCCAGGAACCTATAATTGGAACCTCG<br>AGTTCCAATTATAGGTCCTGGGTTTTTG<br>TRCN0000057711:CCGGGTCCTCCATAAAGAACTTGATCTCG<br>AGATCAAGTTCTTTATGGAGGACTTTTTG |
| Non-Target<br>Control         | SHC002:CCGGCAACAAGATGAAGAGCACAACCTCGAGTTGGT<br>GCTCTTCATCTTGTTGTTTTT                                                                                           |

## **SUPPLEMENTARY METHODS**

**Wound healing assay.** Cell mobility was studied by a scratch wound-healing assay. Briefly, cells were cultured in a 6-well plate until confluence. The culture medium was replaced by serum-free medium 24 h before wound creation. The cell layer was wounded using a sterile tip. After wounding, the medium was changed to fresh serum-free medium to remove cellular debris. Serial photographs were obtained at different time points.

**Xenograft processing and cell dissociation.** Xenografts dissected from mice were dissociated into single cells using Liberase TM (Roche) which contained a blend of collagenase I and collagenase II. Before processing, tumor tissues were rinsed with PBS once and then rinsed again with DMEM/F-12 (Gibco) supplemented with 1% penicillin/streptomycin (P/S). For every 1 cm<sup>3</sup> tissue, 5 µg per ml Liberase enzymes were added to DMEM/F-12 medium for dissociation. Tumor tissues were minced into less than 1 mm<sup>3</sup> pieces in the presence of supplemented medium in a cell culture dish under sterile condition. The cell suspension was subsequently filtered through a 100 µm cell strainer and washed with DMEM/F-12 medium. The cells were cultured in complete DMEM medium supplemented with 10% FBS and 1% P/S.
